# Supplementary material for: Preparation and Characterization of Low-Cost Ceramic Membrane Coated with Chitosan: Application to the Ultrafine Filtration of Cr(VI)
Source: MDPI journal article supplement (doi:10.3390/membranes12090835), 2022-08-26
Supplement: s1 [file s1]

## Supplementary Information

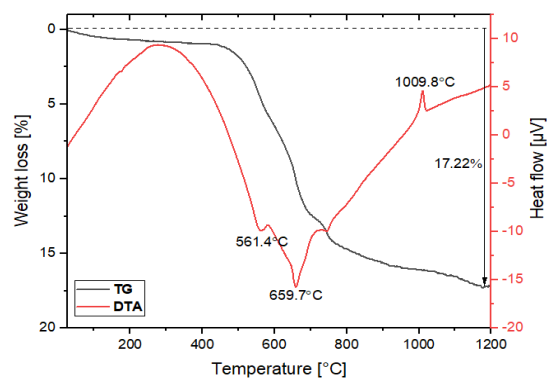

(A)

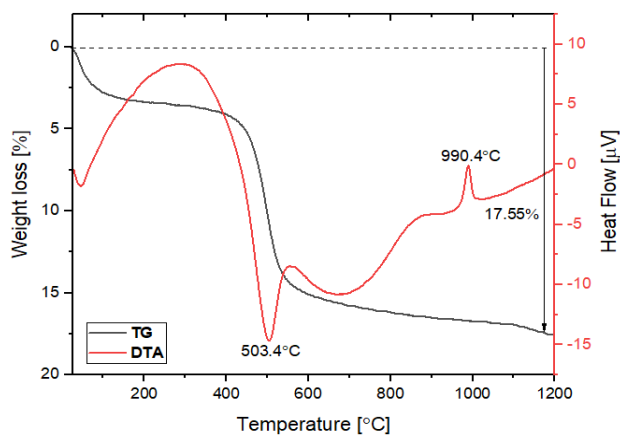

(B)

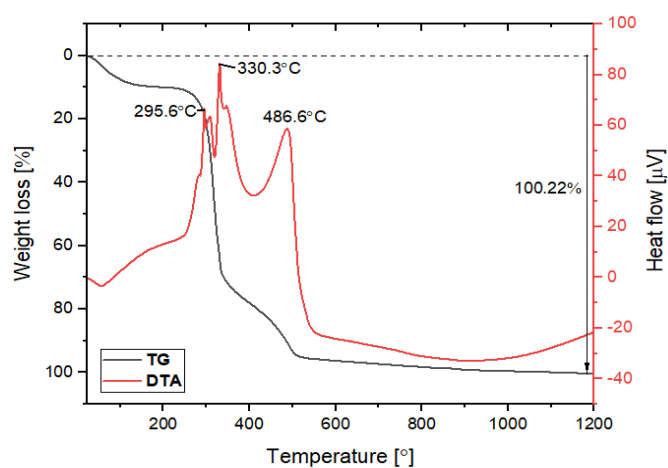

(C)

**Figure S1.** TG-DTA curves for kaolin (A), clay (B) and starch(C).

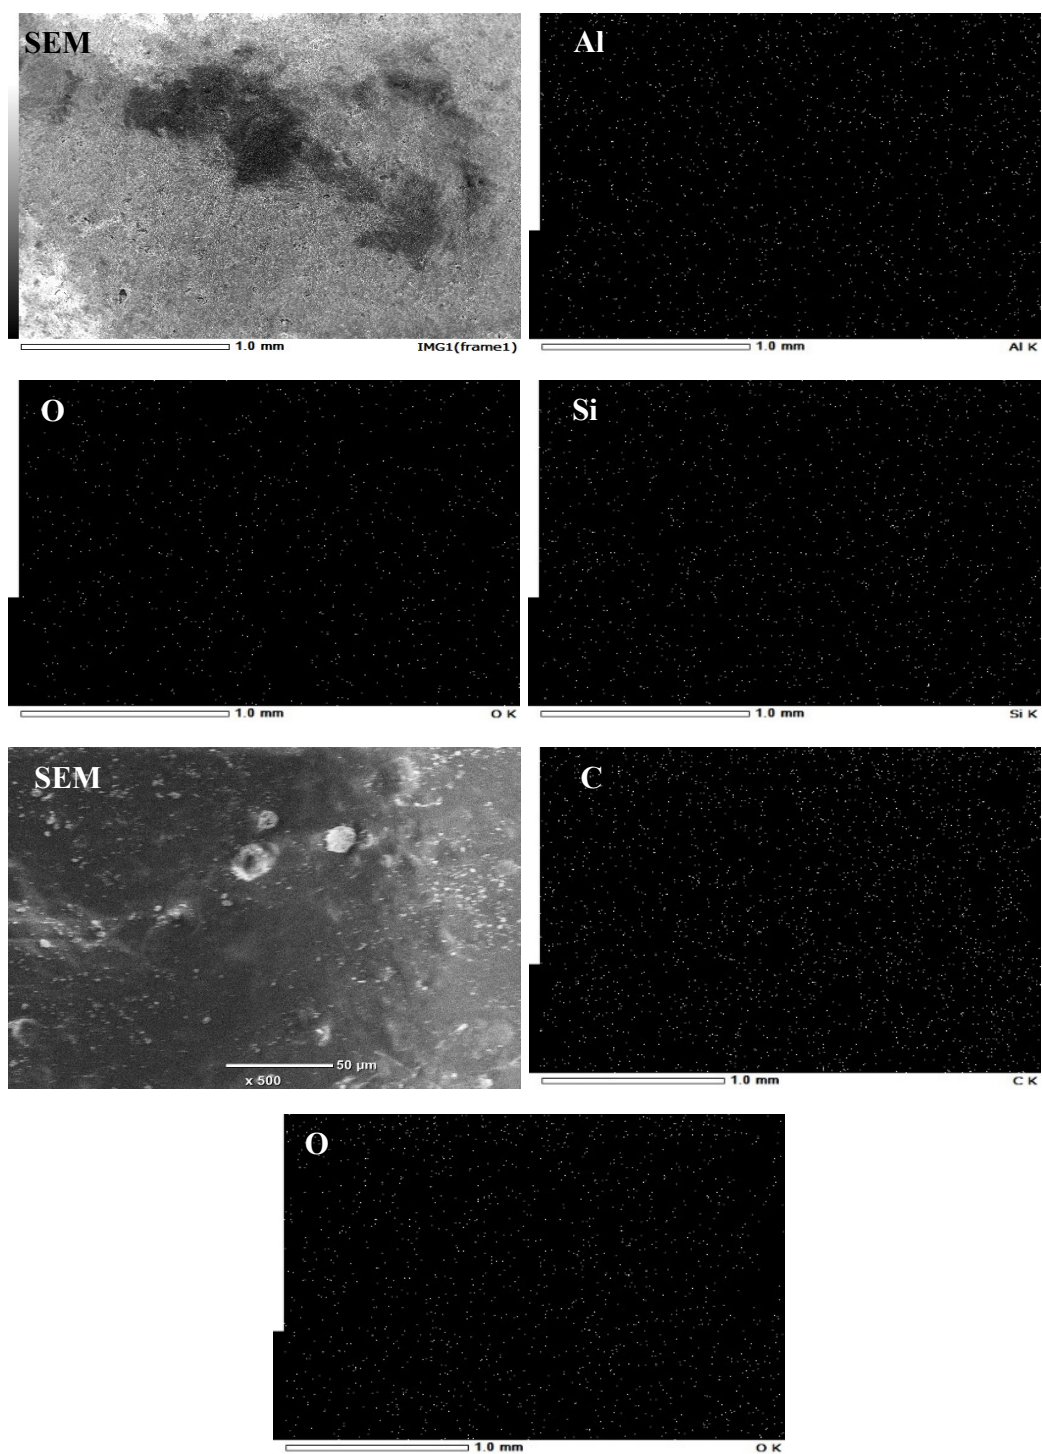

**Figure S2.** SEM images and mapping images of CMs before coating and after coated with cross-linked chitosan.

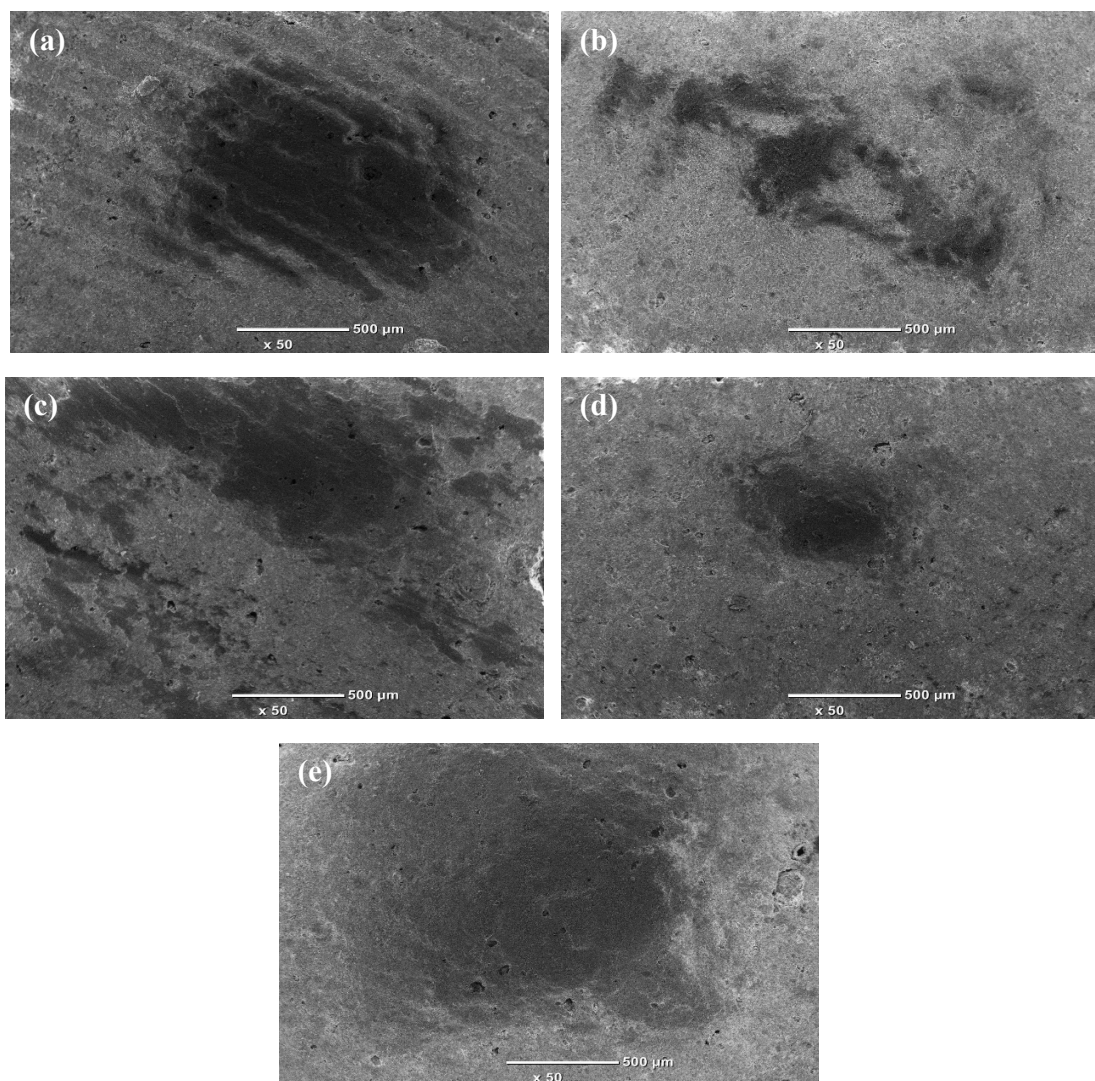

**Figure S3.** SEM images of CMs surface after sintered at 950°C (a), 1000°C(b), 1050°C(c), 1100°C(d) and 1150°C(e) for 3h.
